# Supplementary material for: Bioactive Polymeric Nanoparticles of Moringa oleifera Induced Phyto-Photothermal Sensitization for the Enhanced Therapy of Retinoblastoma
Source: MDPI journal article supplement (doi:10.3390/pharmaceutics15020475), 2023-01-31
Supplement: s1 [file s1]

# Bioactive polymeric nanoparticles of *Moringa oleifera* induced phyto-photothermal sensitization for the enhanced therapy of retinoblastoma

Sushma V Mudigunda<sup>1#</sup>, Deepak B. Pemmaraju<sup>2#</sup>, Sri Amruthaa Sankaranarayanan<sup>1</sup>, Aravind Kumar Rengan<sup>1\*</sup>

<sup>1</sup> Department of Biomedical Sciences, Indian Institute of Technology Hyderabad, Kandi, Telangana, India.

<sup>2</sup> Department of Pharmacology & Toxicology, National institute of pharmaceutical education & research (NIPER) Guwahati, Assam, India.

\* Correspondence: aravind@bme.iith.ac.in; Tel.: (+91-40) 2301 – 6106).

# Contributed equally.

## SUPPORTING INFORMATION

| Phytochemicals | HFM | DFM | CFM | AFM |
|----------------|-----|-----|-----|-----|
| Flavonoids     | -   | +   | -   | +   |
| Alkaloids      | -   | +   | +   | -   |
| Terpenoids     | +   | +   | -   | -   |
| Tannins        | -   | -   | -   | +   |
| Glycosides     | +   | +   | -   | -   |
| Saponins       | -   | -   | +   | -   |
| Phenols        | -   | -   | -   | -   |
| Steroids       | -   | -   | -   | -   |

**Figure S1.** Phytochemical screening of various extracts of *M. oleifera*.

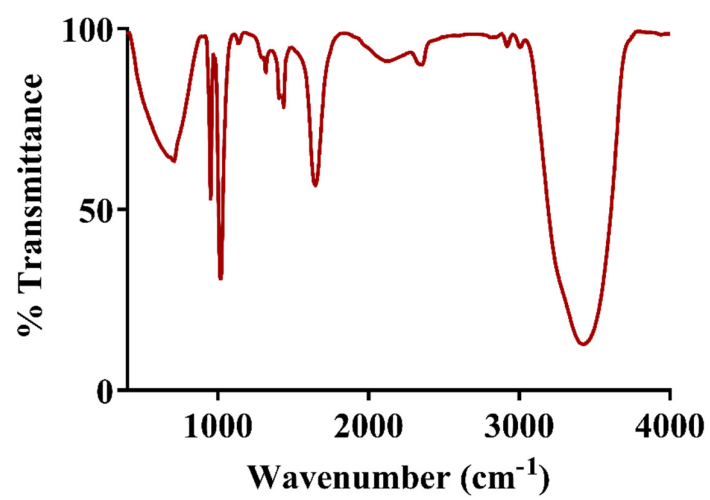

**Figure S2.** FTIR spectra of DFM.

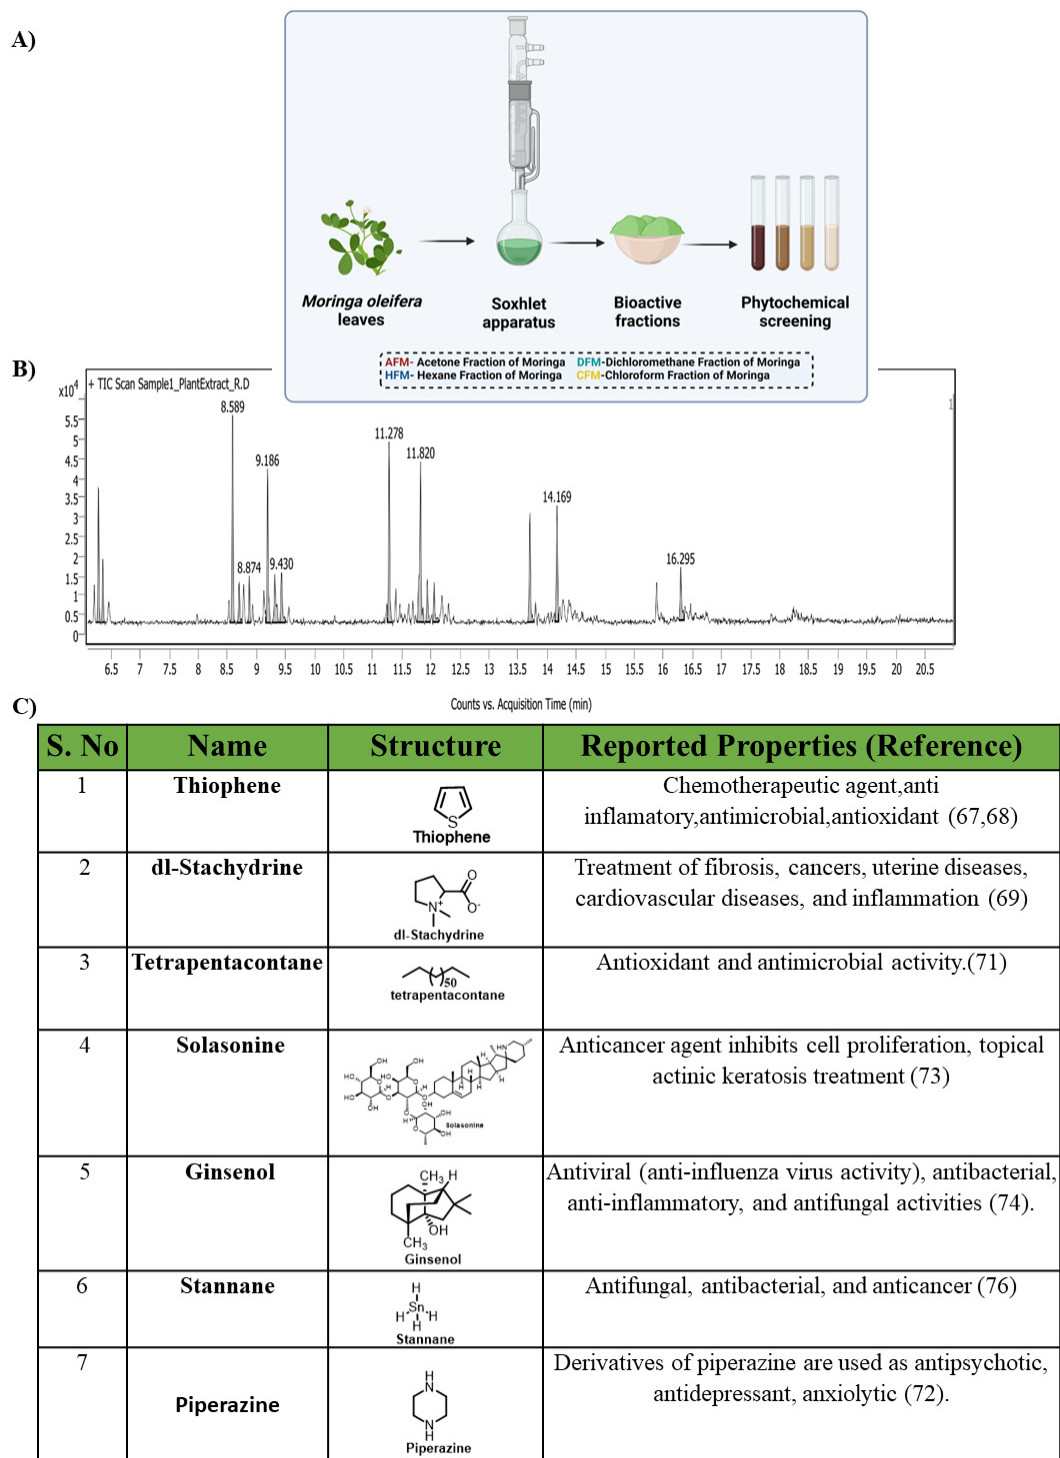

**Figure S3.** (A) A schematic depicting the extraction procedure of DFM, (B) GC-MS analysis of the DFM and (C) List of components present in the DFM and their medicinal uses.

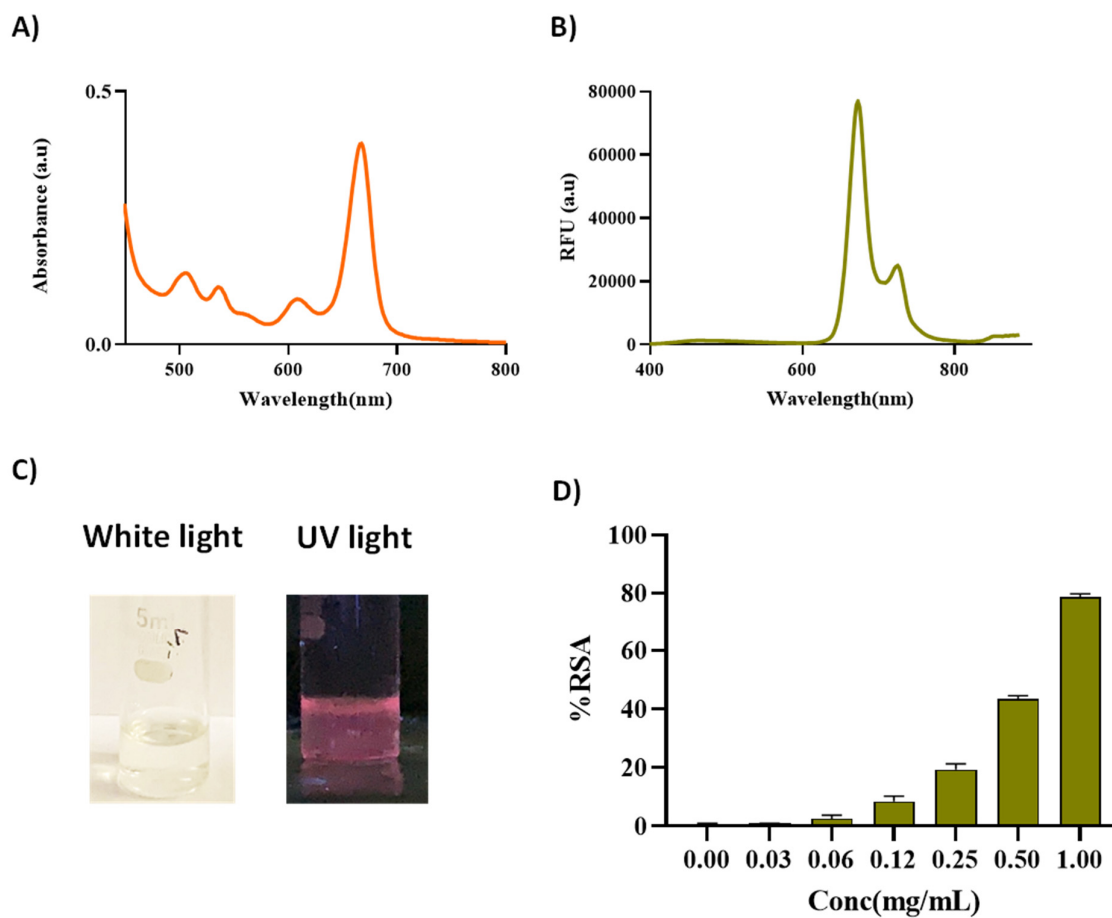

**Figure S4.** (A) UV- Vis absorbance, (B) Fluorescence spectrum, (C) Photographs of DFM under bright light and UV light & (D) Radical scavenging activity of DFM.

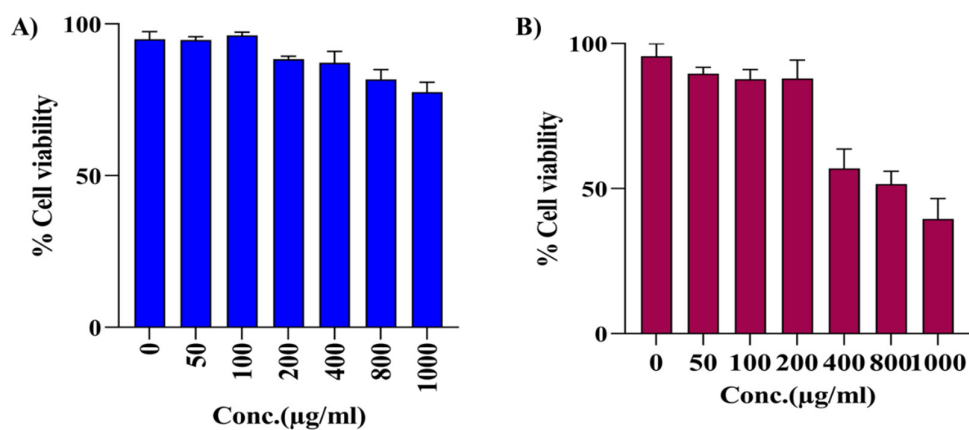

**Figure S5.** % Cell viability of (A) HRMEV and (B) Y79 cell lines treated with DFM.

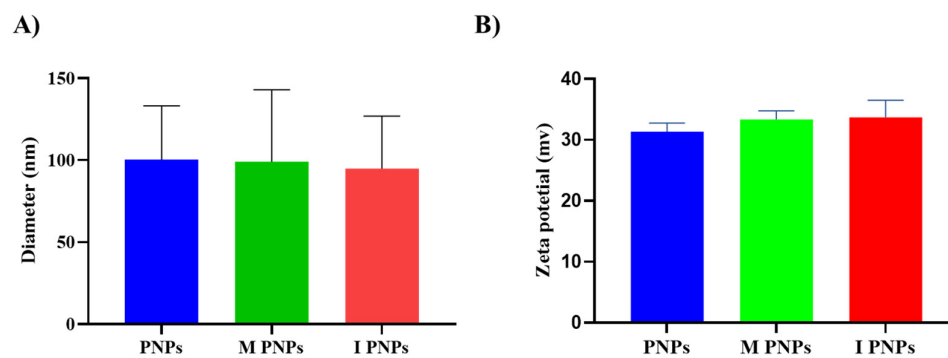

**Figure S6.** Hydrodynamic diameter and Zeta potential of the synthesized nanoparticles.

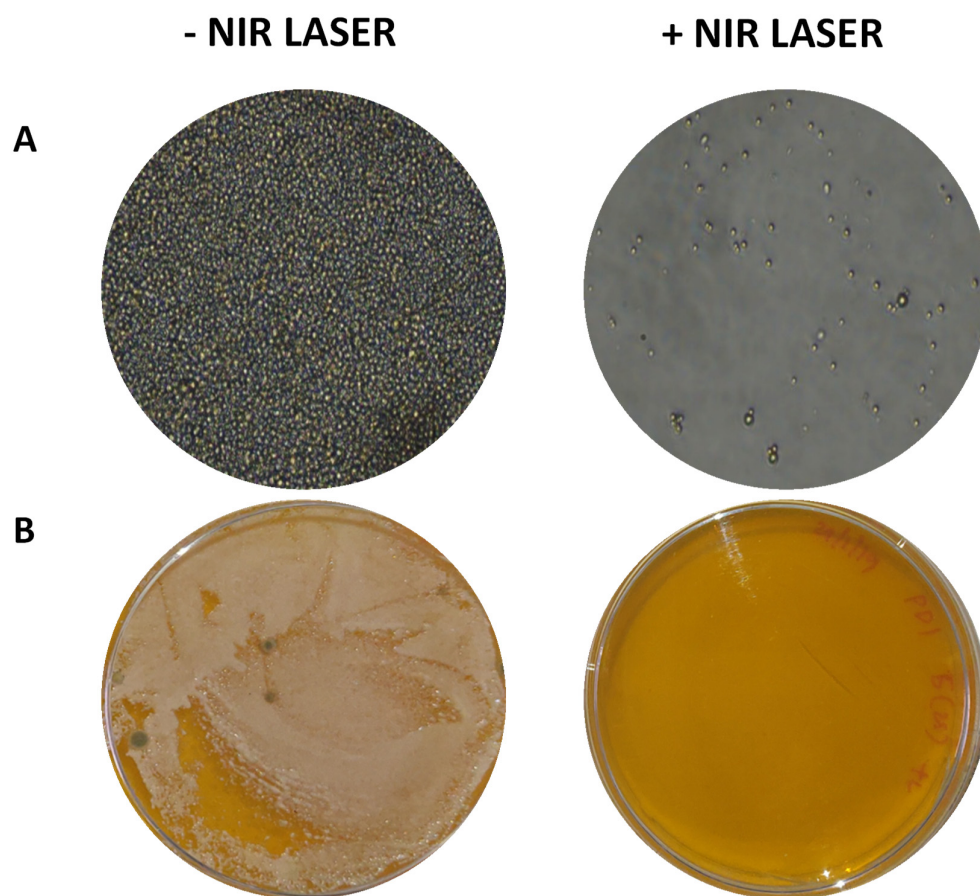

**Figure S7.** Anti-fungal activity of the synthesized MI PNP nanoparticles upon NIR laser irradiation.
